# Supplementary material for: Large Recovery of Fish Biomass in a No-Take Marine Reserve
Source: PubMed Central journal article supplement (PMC3155316; doi:10.1371/journal.pone.0023601), 2011-08-12
Supplement: pone.0023601.s001.pdf [file pone.0023601.s001.pdf]

Table S1. Analyses of variance of Simpsons diversity index obtained using the different species per each trophic group for every category.

| Categories  | TL                | 1999 | 2009 | F       | P       |
|-------------|-------------------|------|------|---------|---------|
| CPNP        | Top predators     | 1.09 | 1.52 | 5.77    | <0.05   |
|             | Active predators  | 2.22 | 1.37 | 2.2     |         |
|             | Benthic predators | 3.85 | 3.70 | 0.12    |         |
|             | Herbivores        | 2.22 | 2.22 | 0.00003 |         |
|             | Zooplanktivores   | 1.28 | 1.14 | 1.34    |         |
| Core zones  | Top predators     | 1.15 | 1.19 | 0.35    |         |
|             | Active predators  | 1.30 | 1.52 | 0.09    |         |
|             | Benthic predators | 3.70 | 2.27 | 24.93   | <0.0001 |
|             | Herbivores        | 2.78 | 2.04 | 6.91    |         |
|             | Zooplanktivores   | 1.54 | 1.32 | 5.78    | <0.05   |
| Open access | Top predators     | 1.18 | 1.11 | 4.15    | <0.05   |
|             | Active predators  | 1.47 | 1.47 | 0.05    |         |
|             | Benthic predators | 2.94 | 2.08 | 33.96   | <0.0001 |
|             | Herbivores        | 2.22 | 1.89 | 8.43    | <0.01   |
|             | Zooplanktivores   | 1.37 | 1.33 | 0.56    |         |
